# Supplementary material for: Coumarin-Induced Delay of Rice Seed Germination Is Mediated by Suppression of Abscisic Acid Catabolism and Reactive Oxygen Species Production
Source: PubMed Central journal article supplement (PMC6609317; doi:10.3389/fpls.2019.00828), 2019-06-27
Supplement: Data_Sheet_1.pdf [file Data_Sheet_1.pdf]

| Number                  | Gene number     | Species                                     | NCBI gene accession number | NCBI protein Accession number | CDS sequence length (bp) | Domain | Reference                                                               |
|-------------------------|-----------------|---------------------------------------------|----------------------------|-------------------------------|--------------------------|--------|-------------------------------------------------------------------------|
| <b>ABA BIOSYNTHESIS</b> |                 |                                             |                            |                               |                          |        |                                                                         |
| 1                       | <i>OsNCED1</i>  | <i>Oryza sativa</i> L. ssp. <i>japonica</i> | AY838897                   | XP_015626662                  | 1917                     | RPE65  | Liu et al., 2011                                                        |
| 2                       | <i>OsNCED2</i>  | <i>Oryza sativa</i> L. ssp. <i>japonica</i> | AY838898                   | XP_015619611.1                | 1731                     | RPE65  |                                                                         |
| 3                       | <i>OsNCED3</i>  | <i>Oryza sativa</i> L. ssp. <i>japonica</i> | AY838899                   | XP_015631538.1                | 1872                     | RPE65  |                                                                         |
| 4                       | <i>OsNCED4</i>  | <i>Oryza sativa</i> L. ssp. <i>japonica</i> | AY838900                   | XP_015645858.1                | 1749                     | RPE65  |                                                                         |
| 5                       | <i>OsNCED5</i>  | <i>Oryza sativa</i> L. ssp. <i>japonica</i> | AY838901                   | XP_015618707.1                | 1842                     | RPE65  |                                                                         |
| 6                       | <i>AtNCED2</i>  | <i>Arabidopsis thaliana</i>                 | NM_117945                  | NP_193569.1                   | 1751                     | RPE65  | Tan et al., 2003;<br>Liu et al., 2011                                   |
| 7                       | <i>AtNCED3</i>  | <i>Arabidopsis thaliana</i>                 | NM_112304                  | NP_188062.1                   | 1800                     | RPE65  |                                                                         |
| 8                       | <i>AtNCED5</i>  | <i>Arabidopsis thaliana</i>                 | NM_102749                  | NP_174302.1                   | 1770                     | RPE65  |                                                                         |
| 9                       | <i>AtNCED6</i>  | <i>Arabidopsis thaliana</i>                 | NP_189064.1                | NP_189064.1                   | 1734                     | RPE65  |                                                                         |
| 10                      | <i>AtNCED9</i>  | <i>Arabidopsis thaliana</i>                 | NM_106486                  | NP_177960.1                   | 1974                     | RPE65  |                                                                         |
| 11                      | <i>ZmNCED1</i>  | <i>Zea mays</i>                             | NM_001112432               | NP_001105902                  | 1815                     | RPE65  | Voisin et al., 2006<br>Alexandrov et al., 2009<br>Schnable et al., 2009 |
| 12                      | <i>ZmNCED2</i>  | <i>Zea mays</i>                             |                            | ONM02149                      | 1554                     | RPE65  |                                                                         |
| 13                      | <i>ZmNCED3</i>  | <i>Zea mays</i>                             | NM_001154055               | NP_001147527                  | 1896                     | RPE65  |                                                                         |
| 14                      | <i>ZmNCED4</i>  | <i>Zea mays</i>                             | XM_008672757               | XP_008670979                  | 1728                     | RPE65  |                                                                         |
| 15                      | <i>ZmNCED5</i>  | <i>Zea mays</i>                             | NM_001154309               | NP_001147781                  | 1722                     | RPE65  |                                                                         |
| 16                      | <i>ZmNCED6</i>  | <i>Zea mays</i>                             | NM_001196164               | NP_001183093                  | 1917                     | RPE65  |                                                                         |
| 17                      | <i>ZmNCED7</i>  | <i>Zea mays</i>                             |                            | ONM61280                      |                          | RPE65  |                                                                         |
| 18                      | <i>ZmNCED8</i>  | <i>Zea mays</i>                             | XM_008647905               | XP_008646127                  | 2097                     | RPE65  |                                                                         |
| 19                      | <i>ZmNCED9</i>  | <i>Zea mays</i>                             | XM_008646423               | XP_008644645.1                | 1806                     | RPE65  |                                                                         |
| 20                      | <i>CmNCED1</i>  | <i>Cucumis melo</i>                         | EU180589                   | ABW80854                      | 740 (partial cds)        | RPE65  | Sun et al., 2013                                                        |
| 21                      | <i>CmNCED4a</i> | <i>Chrysanthemum x morifolium</i>           | AB247159                   | BAF36655                      | 1806                     | RPE65  | Ohmiya et al., 2006                                                     |
| 22                      | <i>CmNCED4b</i> | <i>Chrysanthemum x morifolium</i>           | AB247161                   | BAF36657                      | 1749                     | RPE65  |                                                                         |
| 23                      | <i>PpNCED1</i>  | <i>Prunus persica</i>                       | EF625684                   | ABV01922                      | 740 (partial cds)        | RPE5   | Zhang et al., 2009                                                      |
| 24                      | <i>PpNCED2</i>  | <i>Prunus persica</i>                       | EU912386                   | ACL00682                      | 742 (partial cds)        | RPE5   |                                                                         |
| 25                      | <i>DkNCED1</i>  | <i>Diospyros kaki</i>                       | EU925812                   | ACL00684                      | 740 (partial cds)        |        | Leng et al., 2009                                                       |
| 26                      | <i>LeNCED1</i>  | <i>Solanum lycopersicum</i>                 | NM_001247526               | NP_001234455                  | 1818                     | RPE65  | Nitsch et al., 2009                                                     |

| ABA CATABOLISM |                                            |                                             |              |              |      |      |                                        |
|----------------|--------------------------------------------|---------------------------------------------|--------------|--------------|------|------|----------------------------------------|
| 27             | <i>OsABA8'ox1</i><br>( <i>OsCYP707A5</i> ) | <i>Oryza sativa</i> L. ssp. <i>japonica</i> | AB277270     | BAF34848     | 1416 | P450 |                                        |
| 28             | <i>OsABA8'ox2</i><br>( <i>OsCYP707A6</i> ) | <i>Oryza sativa</i> L. ssp. <i>japonica</i> | NM_001068556 | XP_015648451 | 1521 | P450 | Liu et al., 2011<br>Saika et al., 2007 |
| 29             | <i>OsABA8'ox3</i><br>( <i>OsCYP707A7</i> ) | <i>Oryza sativa</i> L. ssp. <i>japonica</i> | NM_001069901 | XP_015610835 | 1503 | P450 |                                        |
| 30             | <i>AtCYP707A1</i>                          | <i>Arabidopsis thaliana</i>                 | AT4G19230    | NP_567581    | 1404 | P450 |                                        |
| 31             | <i>AtCYP707A2</i>                          | <i>Arabidopsis thaliana</i>                 | AT2G29090    | XP_020885163 | 1458 | P450 | Umezawa et al., 2006                   |
| 32             | <i>AtCYP707A3</i>                          | <i>Arabidopsis thaliana</i>                 | AT5G45340    | OAO93915     | 1722 | P450 | Millar et al., 2006                    |
| 33             | <i>AtCYP707A4</i>                          | <i>Arabidopsis thaliana</i>                 | AT3G19270    | NP_001319589 | 1332 | P450 |                                        |
| 34             | <i>PtCYP707A4</i>                          | <i>Populus trichocarpa</i>                  | XM_002313817 | XP_002313853 | 1424 | P450 | Zheng et al., 2012                     |
| 35             | <i>LsABA8ox1</i>                           | <i>Lactuca sativa</i>                       | AB235917     | BAG12741     | 1395 | P450 |                                        |
| 36             | <i>LsABA8ox2</i>                           | <i>Lactuca sativa</i>                       | XM_023904641 | XP_023760409 | 1455 | P450 |                                        |
| 37             | <i>LsABA8ox3</i>                           | <i>Lactuca sativa</i>                       | AB235919     | BAG12743     | 1404 | P450 | Sawada et al., 2008                    |
| 38             | <i>LsABA8ox4</i>                           | <i>Lactuca sativa</i>                       | AB235920     | BAG12744     | 1482 | P450 |                                        |
| 39             | <i>GmCYP707A1a</i>                         | <i>Glycine max</i>                          | EF377341     | ABQ65856     | 1407 | P450 |                                        |
| 40             | <i>GmCYP707A1b</i>                         | <i>Glycine max</i>                          | XM_003534293 | XP_003534341 | 1407 | P450 | Zheng et al., 2012                     |
| 41             | <i>NtCYP707A</i>                           | <i>Nicotiana tabacum</i>                    | NM_001325315 | NP_001312244 | 1437 | P450 | Simon-Mateo et al., 2006               |
| 42             | <i>StCYP707A1</i>                          | <i>Solanum tuberosum</i>                    | NM_001288216 | NP_001275145 | 1410 | P450 | Suttle et al., 2013                    |
| 43             | <i>PvCYP707A1</i>                          | <i>Phaseolus vulgaris</i>                   | DQ352541     | ABC86558     | 1395 | P450 |                                        |
| 44             | <i>PvCYP707A2</i>                          | <i>Phaseolus vulgaris</i>                   | DQ352542     | ABC86559     | 1398 | P450 | Yang and Zeevaart, 2006                |
| 45             | <i>PvCYP707A3</i>                          | <i>Phaseolus vulgaris</i>                   | DQ352543     | ABC86560     | 1458 | P450 |                                        |
| 46             | <i>Zm00001d051554</i>                      | <i>Zea mays</i>                             | NM_001346919 | NP_001333848 | 1428 | P450 |                                        |
| 47             | <i>Zm00001d050021</i>                      | <i>Zea mays</i>                             | NM_001347215 | NP_001334144 | 1515 | P450 |                                        |
| 48             | <i>Zm00001d005889</i>                      | <i>Zea mays</i>                             |              | ONM22327     |      | P450 | Schnable et al., 2009                  |
| 49             | <i>Zm00001d017762</i>                      | <i>Zea mays</i>                             | NM_001176331 | NP_001169802 | 1413 | P450 |                                        |
| 50             | <i>Zm00001d020717</i>                      | <i>Zea mays</i>                             | NM_001137126 | NP_001130598 | 1500 | P450 |                                        |

## REFERENCES

- Alexandrov, N., Brover, V., Freidin, S., Troukhan, M., Tatarinova, T., Zhang, H, et al. (2009). Insights into corn genes derived from large-scale cDNA sequencing. *Plant Mol. Biol.* 69 (1-2), 179-194. doi: 10.1007/s11103-008-9415-4
- Leng, P. , Zhang, G. L. , Li, X. X. , Wang, L. H. , and Zheng, Z. M. (2009). Cloning of 9-cis-epoxycarotenoid dioxygenase (nced) gene encoding a key enzyme during abscisic acid (aba) biosynthesis and aba-regulated ethylene production in detached young persimmon calyx. *Chin. Sci. Bull.* 54(16), 2830-2838. doi.org/10.1007/s11434-009-0685-2
- Liu, F., Zhang, H., Wu, G., Sun, J., Hao, L., Ge, X., et al. (2011). Sequence variation and expression analysis of seed dormancy-and germination-associated ABA- and GA-related genes in rice cultivars. *Front Plant Sci.* 2:1-13. doi.org/10.3389/fpls.2011.00017
- Nitsch, L., Oplaat, C., Feron, R., Ma, Q., Wolters-Arts, M., Hedden, P., et al. (2009). Abscisic acid levels in tomato ovaries are regulated by *LeNCEDI* and *SICYP707A1*. *Planta* 229, 1335–1346. doi.org/10.1007/s00425-009-0913-7
- Millar, A., Jacobsen, J., Ross, J., Helliwell, C., Poole, A., Scofield, G., et al. (2006). Seed dormancy and ABA metabolism in *Arabidopsis* and barley: the role of ABA 8'-hydroxylase. *Plant J.* 45:9542-954. doi: 10.1111/j.1365-313X.2006.02659.x
- Tan, B-C., Joseph, L., Deng, W-T., Liu, L., Li, Q-B., Cline, K., et al. (2003). Molecular characterization of the *Arabidopsis* 9-cis epoxycarotenoid dioxygenase gene family. *Plant J.* 35:44-56. doi: 10.1046/j.1365-313X.2003.01786.x
- Umezawa T, Okamoto M, Kushiro T, Nambara E, Oono Y, Seki M., et al. (2006). CYP707A3, a major ABA 8'-hydroxylase involved in dehydration and rehydration response in *Arabidopsis thaliana*. *Plant J.* 46:171-182. doi: 10.1111/j.1365-313X.2006.02683.x
- Ohmiya, A., Kishimoto, S., Aida, R., Yoshioka, S., and Sumitomo, K. (2006). Carotenoid cleavage dioxygenase (CmCCD4a) contributes to white color formation in chrysanthemum petals. *Plant Physiol.* 142:1193-1201. doi/10.1104/pp.106.087130
- Saika, H., Okamoto, M., Miyoshi, K., Kushiro, T., Shinoda, S., Jikumaru, Y., et al. (2007). Ethylene promotes submergence-induced expression of *OsABA8ox1*, a gene that encodes ABA 8'-hydroxylase in rice. *Plant Cell Physiol.* 48 (2):287-298. doi:10.1093/pcp/pcm003
- Sawada, Y., Aoki, M., Nakaminami, K., Mitsunashi, W., Tatematsu, K., Kushiro, T., et al. (2008). Phytochrome- and gibberellin-mediated regulation of abscisic acid metabolism during germination of photoblastic lettuce seeds. *Plant Physiol.* 146: 1386-1396. doi: 10.1104/pp.107.115162
- Schnable, P., Ware, D., Fulton, R., Stein, J., Wei, F. et al. (2009). Pasternak S The B73 maize genome: complexity, diversity, and dynamics. *Science.* 337(6098):1040. doi: 10.1126/science.1178534
- Simon-Mateo, C., Depuydt, S., Oliveira Manes, C., Cnudde, F., Holsters, M., Goethals, K., et al. (2006). The phytopathogen *Rhodococcus fascians* breaks apical dominance and activates axillary meristems by inducing plant genes involved in hormone metabolism. *Mol. Plant Pathol.* 7 (2), 103-112.

doi.org/10.1111/j

- Sun, Y., Chen, P., Duan, C., Tao, T., Wang, Y., Ji, K., et al (2013). Transcriptional regulation of genes encoding key enzymes of abscisic acid metabolism during melon (*Cucumis melo* L.) fruit development and ripening. *J. Plant Growth Regul.* 32: 233. doi.org/10.1007/s00344-012-9293-5
- Suttle, J., Lulai, E., Huckle, L. and Neubauer, J. (2013). Wounding of potato tubers induces increases in ABA biosynthesis and catabolism and alters expression of ABA metabolic genes. *J Plant Physiol.* 170: 560-566. doi: org/10.1016/j.jplph.2012.11.012
- Voisin, A., Reidy, B., Parent, B., Rolland, G., Redondo, E., Gerentes, D., et al. (2006). Are ABA, ethylene or their interaction involved in the response of leaf growth to soil water deficit? An analysis using naturally occurring variation or genetic transformation of ABA production in maize. *Plant Cell Environ.* 29 (9), 1829-1840. doi: org/10.1111/j
- Yang, S. and Zeevaart, J. (2006). Expression of ABA 8'-hydroxylases in relation to leaf water relations and seed development in bean. *Plant J.* 47: 675-686. doi: 10.1111/j.1365-313X.2006.02815.x
- Zhang, M., Leng, P., Zhang, G. and Li, X. (2009). Cloning and functional analysis of 9-cis-epoxycarotenoid dioxygenase (NCED) genes encoding a key enzyme during abscisic acid biosynthesis from peach and grape fruits. *J. Plant Physiol.* 166 (12):1241-1252. doi.org/10.1016/j.jplph.2009.01.013
- Zheng, Y., Huang, Y., Xian, W., Wang, J. and Liao, H. (2012). Identification and expression analysis of the *Glycine max* CYP707A gene family in response to drought and salt stress. *Ann. Bot.* 110: 743 –756. doi:10.1093/aob/mcs133
