# Supplementary material for: Coumarin-Induced Delay of Rice Seed Germination Is Mediated by Suppression of Abscisic Acid Catabolism and Reactive Oxygen Species Production
Source: PubMed Central journal article supplement (PMC6609317; doi:10.3389/fpls.2019.00828), 2019-06-27
Supplement: Data_Sheet_2.pdf [file Data_Sheet_2.pdf]

1 **SUPPLEMENTARY TABLE 2** | Primer sequences for qPCR of *OsGAPDH1*,  
 2 *OsNCEDs*, and *OsABA8'oxs*

| <b>Gene</b> | <b>Locus</b>   | <b>Primer sequence</b>                                                      | <b>Product length</b> |
|-------------|----------------|-----------------------------------------------------------------------------|-----------------------|
| OsNCED1     | LOC_Os02g47510 | Forward: 5'-GAACTTCGACTTCCCCGTGA-3'<br>Reverse: 5'-ACGTAGCACACCAAGTACCC-3'  | 252                   |
| OsNCED2     | LOC_Os12g24800 | Forward: 5'-GAGCCTTGAGTTCGGTGTCA-3'<br>Reverse: 5'-CAGCAAAGCACCCCTAGACCA-3' | 179                   |
| OsNCED3     | LOC_Os03g44380 | Forward: 5'-ATATGGCGACGATCACGACG-3'<br>Reverse: 5'-CGCGGAGAATCTCACCGAAT-3'  | 110                   |
| OsNCED4     | LOC_Os07g05940 | Forward: 5'-TCGGGAGGTACGACTTCCAT-3'<br>Reverse: 5'-TTGAGGTACGGCTTGGACAC-3'  | 127                   |
| OsNCED5     | LOC_Os12g42280 | Forward: 5'-CGAGCTCACCAAGTTCGAGT-3'<br>Forward: 5'-TTGATGAAGGTGCCGTGGAA-3'  | 249                   |
| OsABA8'ox1  | LOC_Os02g47470 | Forward: 5'-AAAACCAACATCAACGGCGG-3'<br>Forward: 5'-GATTGCCAACCGTGGTCCTA-3'  | 189                   |
| OsABA8'ox2  | LOC_Os08g36860 | Forward: 5'-CGTGTGTGTGGATGCAATGG-3'<br>Forward: 5'-AGTGCTACTACTAGGCACACC-3' | 213                   |
| OsABA8'ox3  | LOC_Os09g28390 | Forward: 5'-CTGGTCACTGGCTACAGGTG-3'<br>Forward: 5'-TGCTACGCCATTGTCGTCAT-3'  | 168                   |
| OsGAPDH1    | LOC_Os02g38920 | Forward: 5'-GCAATCAAGGAGGAGGCTGA-3'<br>Reverse: 5'-ACGTGTCGCTCAAAGCAATG-3'  | 139                   |

3
